# Supplementary material for: NMNAT2 is a druggable target to drive neuronal NAD production
Source: Springer Nature journal article supplement (doi:10.1038/s41467-024-50354-5), 2024-07-24
Supplement: MOESM3 [file 41467_2024_50354_MOESM3_ESM.pdf]

### **Description of Additional Supplementary Files**

**Supplementary Data 1.** Data corresponding to Supplementary Figure 6 in table form including compound structures.

**Supplementary Data 2.** Data corresponding to statistical testing for Figure 8B.
